# Supplementary material for: Prediction of Radiotherapy Compliance in Elderly Cancer Patients Using an Internally Validated Decision Tree
Source: MDPI journal article supplement (doi:10.3390/cancers14246116), 2022-12-12
Supplement: s1 [file s1]

**The odds ratio of noncompliance with the corresponding 95% confidence interval and p-value for each branch on the developed decision tree to predict compliance in elderly cancer patients.**

| Node | Variable       | Levels      | Noncompliance | Compliance | Odds ratio (95% CI) | P-value |
|------|----------------|-------------|---------------|------------|---------------------|---------|
| 1    | Patient Status | Out-patient | 46            | 258        | 0.48 (0.29 - 0.78)  | <0.05   |
|      |                | In-patient  | 41            | 111        |                     |         |
| 2    | Sex            | Female      | 19            | 142        | 0.57 (0.30 - 1.08)  | 0.08    |
|      |                | Male        | 27            | 116        |                     |         |
| 3    | Cancer type    | Metastatic  | 02            | 27         | 0.28 (0.04 - 1.04)  | 0.06    |
|      |                | Others      | 25            | 89         |                     |         |
| 4    | Cancer type    | Lung        | 11            | 38         | 1.05 (0.42 - 2.60)  | 0.90    |
|      |                | Others      | 14            | 51         |                     |         |
| 7    | Age            | Above 76    | 00            | 20         | -                   | -       |
|      |                | Below 76    | 02            | 07         |                     |         |
| 10   | CCI            | Below 7     | 14            | 128        | 0.25 (0.09 – 0.91)  | 0.03    |
|      |                | Above 7     | 05            | 14         |                     |         |
| 11   | ECOG-PS        | 3-4         | 00            | 11         | -                   | -       |
|      |                | 0-2         | 14            | 117        |                     |         |
| 15   | CCI            | Below 6     | 23            | 35         | 2.55 (1.32 – 5.67)  | <0.05   |
|      |                | Above 6     | 18            | 76         |                     |         |
| 16   | Fraction type  | Conv        | 15            | 29         | 0.39 (0.10 - 1.37)  | 0.12    |
|      |                | Hypo        | 18            | 06         |                     |         |
| 17   | Sex            | Male        | 04            | 14         | 0.40 (0.09 - 1.52)  | 0.17    |
|      |                | Female      | 11            | 15         |                     |         |
| 21   | Insurance      | MC          | 01            | 11         | 0.39 (0.01 - 2.28)  | 0.31    |
|      |                | HI          | 17            | 65         |                     |         |
| 22   | Treatment aim  | Palliative  | 13            | 55         | 0.58 (0.16 - 2.49)  | 0.43    |
|      |                | Curative    | 04            | 10         |                     |         |
